# Supplementary material for: Flow cytometry for on-line microbial regrowth monitoring in a membrane filtration plant: pilot-scale case study for wastewater reuse
Source: Royal Society of Chemistry journal article supplement (doi:10.1039/d2ew00921h), 2023-01-01
Supplement: d2ew00921h1.pdf [file d2ew00921h1.pdf]

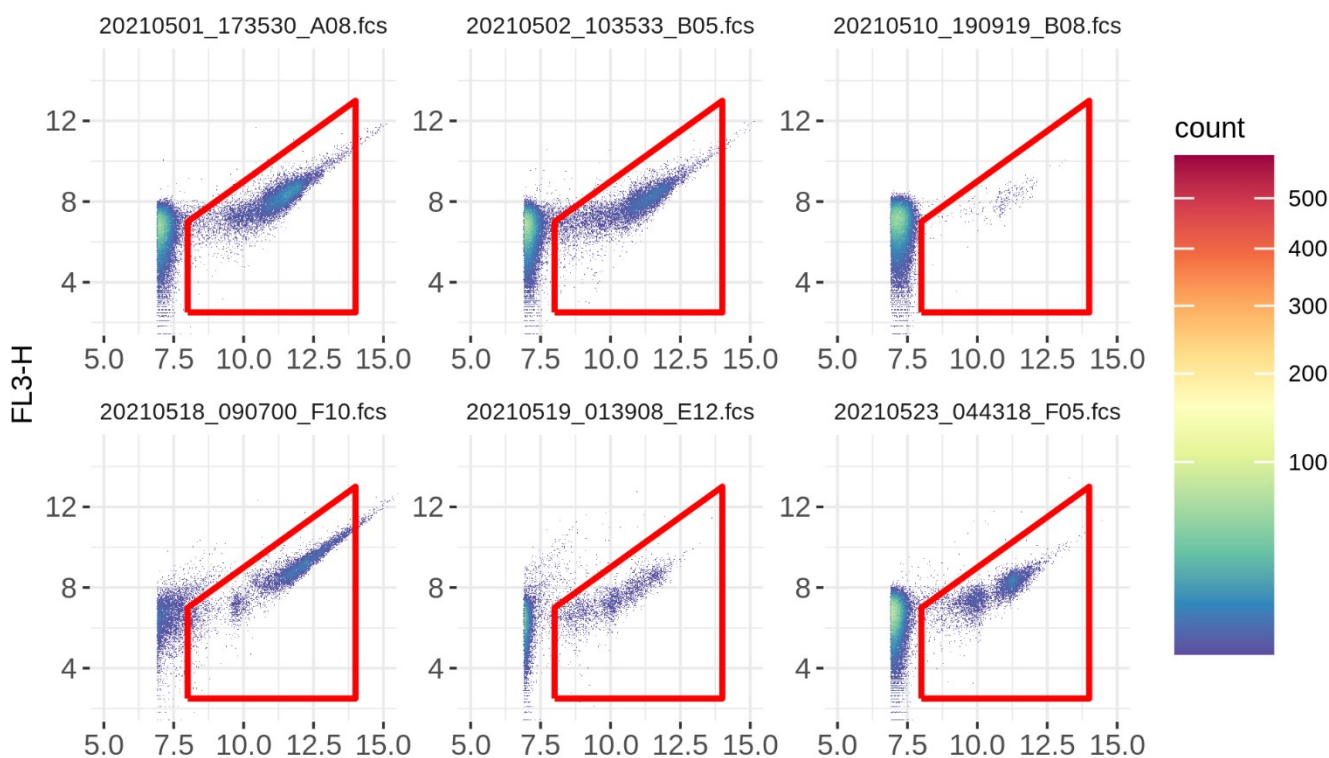

Figure S1: Gating strategy applied to distinguish between background noise and cells.

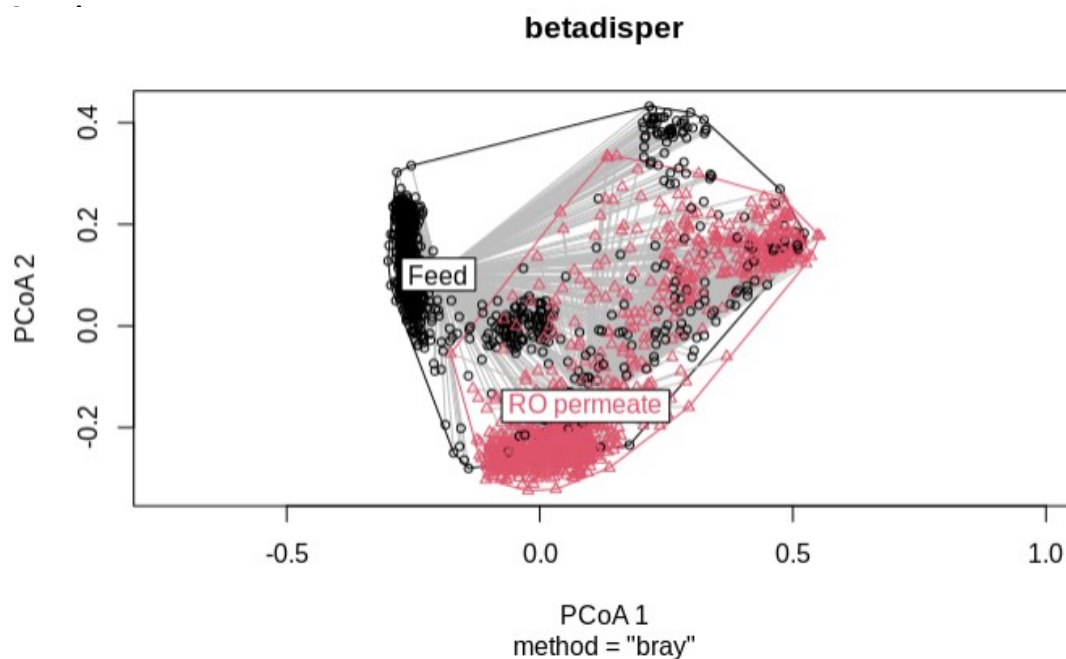

Figure S2: The general betadispersivity plot. The betadispersivity calculates the average distance of each group to their centroid (median). This was used to evaluate the dispersivity within the sample.

**Pantarein**

Egide Walschaertsstraat 22L  
 B-2800 Mechelen

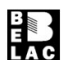

ACCREDITATIE NR.: 080-TEST  
 ISO 17025

|                       |            |                   |                                                       |
|-----------------------|------------|-------------------|-------------------------------------------------------|
| Ons referentnummer    | 2106-28350 | Referte aanvrager | <b>Citrique Belge, Tienen / R0 permeaat r001-hv18</b> |
| Datum ontvangst       | 28/06/2021 | Staalname door:   | Segers Gert (NFC)                                     |
| Datum inzet           | 29/06/2021 | datum:            | 28/06/2021 10:02:00                                   |
| Staat van het monster | gekoeld    | Aard monster      | drinkwater                                            |
| Stockage labo         | frigo      |                   |                                                       |
| Status rapport        | definitief |                   |                                                       |
| Datum opmaak rapport  | 5/07/2021  |                   |                                                       |

| Parameter             | Waarde        | Eenheid         | Methode                                                                                       | Min. | Max.            |
|-----------------------|---------------|-----------------|-----------------------------------------------------------------------------------------------|------|-----------------|
| E. coli               | 0             | CFU / 100 ml    | WAC/VA/002 (**)                                                                               |      | 0               |
| Totaal kiemgetal 22°C | 3             | CFU / ml        | NF EN ISO 6222 - WAC/VA/001 (**)                                                              |      | indicatorwaarde |
| Totale Coliformen     | 0             | CFU / 100 ml    | WAC/VA/002 (**)                                                                               |      | 0               |
| geleidbaarheid        | 30,9          | µS/cm bij 20 °C | WAC/III/A/004 - ISO 7888 (**)                                                                 |      | 2500            |
| geur                  | aanvaardbaar  |                 | Eigen methode                                                                                 |      |                 |
| kleur                 | niet gekleurd |                 | Eigen methode                                                                                 |      |                 |
| nitraat               | 1,74          | mg/l            | eigen methode gebaseerd op WSAQTON en WSAQNO2 (spectrofotometrie), WAC/III/C, CMA/2/I/C (E**) |      | 50              |
| nitriet               | <0,033        | mg/l            | ISO 15923-1 (discrete analyser) (WAC/III/C, CMA/2/I/C) (E**)                                  |      | 0,5             |
| pH (zuurtegraad)      | <b>6,1</b>    | (28,4°C)        | WAC/III/A/005 - ISO 10523 (**)                                                                | 6,5  | 9,5             |
| smaak                 | niet getest   |                 | Eigen methode                                                                                 |      |                 |
| troebelingsgraad      | 0,1           | NTU             | Afgeleid van SM 2130                                                                          |      | indicatorwaarde |

KB 14/01/2002 (n)

**Conclusie: alle numerieke resultaten, vet gedrukt, zijn niet bevredigend (tenzij de min.- of max-waarden richtwaarden betreffen) (parameters, waarvan de norm niet vermeld is, zijn niet beoordeeld)**

(\*): geschat aantal - (\*\*): geaccrediteerde test (indien WAC,CMA of BAM-methode:tevens VLAREL-erkend - (E): extern labo - (E\*\*): geaccrediteerde test bij extern labo - (n): bron vermelde normen

|                                                                                                                      |
|----------------------------------------------------------------------------------------------------------------------|
| Opmerking<br>aanvrager:                                                                                              |
| Opmerking Bemonsteringsprocedure MW ** - Monstername verslag is beschikbaar, zie ons referentnummer. MO pH: 2% labo: |

Deze beproevingsresultaten hebben uitsluitend betrekking op het hierboven beschreven proefobject. De meetonzekerheden en de gegevens van het externe labo kunnen bij het laboratorium opgevraagd worden. Dit verslag mag niet worden gereproduceerd, behalve in volledige vorm, zonder de schriftelijke toestemming van het beproevingslaboratorium. Indien de monstername "door de aanvrager" gebeurd is, kan, betreft de houdbaarheid, alleen rekening worden gehouden met de ontvangstdatum.

Rapport lay-out: R029A10-02

Dr. ir. Stefan Coghe  
 Algemeen Directeur

Figure S3: Report of the permeate quality tests from a sample taken on 28/06/2021. The analysis done is comparable to a drinking water analysis. Based on the results, the permeate water was of excellent microbial quality. Especially the absence of *E.coli* and coliforms means that no pathogenic bacteria were present in the permeate.

Significant increases/decreases in cell density in the feed, based on the Sign of differences test.

Significant run from 2021-05-06 16:47:15 to 2021-05-06 20:51:13  
Significant run from 2021-05-06 23:56:55 to Day 2 01:30:09  
Significant run from Day 2 04:37:16 to Day 2 05:08:33  
Significant run from Day 2 05:39:52 to Day 2 06:11:11  
Significant run from Day 2 06:42:31 to Day 2 07:45:17  
Significant run from Day 2 08:16:30 to Day 2 08:49:59  
Significant run from Day 2 09:20:36 to Day 2 09:51:19  
Significant run from Day 2 10:22:01 to Day 2 10:52:48  
Significant run from Day 2 12:56:02 to Day 2 13:57:44  
Significant run from Day 2 14:59:29 to Day 2 15:30:23  
Significant run from Day 2 17:32:46 to Day 2 20:07:51  
Significant run from Day 2 20:38:54 to Day 2 23:14:23  
Significant run from Day 3 01:21:11 to Day 3 01:51:55  
Significant run from Day 3 02:22:40 to Day 3 02:53:24  
Significant run from Day 3 03:24:11 to Day 3 03:54:58  
Significant run from Day 3 05:58:22 to Day 3 07:00:13  
Significant run from Day 3 07:31:09 to Day 3 08:33:06  
Significant run from Day 3 09:35:10 to Day 3 11:39:33  
Significant run from Day 3 12:41:53 to Day 3 13:13:02  
Significant run from Day 3 15:17:59 to Day 3 15:49:16  
Significant run from Day 3 16:20:36 to Day 3 16:51:55  
Significant run from Day 3 17:56:32 to Day 3 18:58:02  
Significant run from Day 3 22:02:58 to Day 3 22:33:53  
Significant run from Day 3 23:35:48 to Day 4 01:39:50  
Significant run from Day 4 02:41:58 to Day 4 04:15:22  
Significant run from Day 4 04:46:32 to Day 4 05:48:57  
Significant run from Day 4 06:20:13 to Day 4 06:51:31  
Significant run from Day 4 07:22:51 to Day 4 07:54:10  
Significant run from Day 4 08:56:58 to Day 4 09:59:39  
Significant run from Day 4 10:33:11 to Day 4 11:03:54  
Significant run from Day 4 11:34:39 to Day 4 12:05:26  
Significant run from Day 4 12:36:14 to Day 4 13:07:04  
Significant run from Day 4 13:37:56 to Day 4 14:08:46  
Significant run from Day 4 15:10:39 to Day 4 15:41:38  
Significant run from Day 4 16:12:39 to Day 4 17:45:48  
Significant run from Day 4 18:17:10 to Day 4 21:23:07  
Significant run from Day 5 02:01:52 to Day 5 03:05:57  
Significant run from Day 5 04:38:05 to Day 5 05:08:48  
Significant run from Day 5 06:10:14 to Day 5 06:40:55  
Significant run from Day 5 07:11:39 to Day 5 07:42:22  
Significant run from Day 5 09:14:33 to Day 5 09:45:16  
Significant run from Day 5 19:34:02 to Day 5 20:04:46  
Significant run from Day 5 20:35:30 to Day 5 21:37:05  
Significant run from Day 5 22:07:52 to Day 5 23:09:35  
Significant run from Day 6 00:11:24 to Day 6 00:42:22  
Significant run from Day 6 02:15:22 to Day 6 02:46:29  
Significant run from Day 6 05:22:05 to Day 6 05:53:16  
Significant run from Day 6 06:55:43 to Day 6 07:27:00  
Significant run from Day 6 08:29:36 to Day 6 09:00:56  
Significant run from Day 6 09:32:19 to Day 6 10:03:42  
Significant run from Day 6 10:35:15 to Day 6 11:06:32  
Significant run from Day 6 11:37:46 to Day 6 12:41:39  
Significant run from Day 6 13:12:23 to Day 6 14:44:37  
Significant run from Day 6 15:46:21 to Day 6 16:48:04  
Significant run from Day 6 17:19:00 to Day 6 17:49:51  
Significant run from Day 6 18:51:46 to Day 6 19:22:48  
Significant run from Day 6 20:56:01 to Day 6 23:31:53  
Significant run from Day 7 01:05:34 to Day 7 01:36:45  
Significant run from Day 7 02:08:06 to Day 7 03:10:48  
Significant run from Day 7 04:13:09 to Day 7 04:46:24  
Significant run from Day 7 07:20:09 to Day 7 08:21:45  
Significant run from Day 7 08:52:33 to Day 7 09:23:22  
Significant run from Day 7 09:53:35 to Day 7 10:24:22  
Significant run from Day 7 11:26:02 to Day 7 11:56:53  
Significant run from Day 7 12:27:47 to Day 7 12:58:40  
Significant run from Day 7 13:29:33 to Day 7 14:00:28  
Significant run from Day 7 15:33:08 to Day 7 16:35:09  
Significant run from Day 7 17:05:49 to Day 7 17:36:47  
Significant run from Day 7 18:38:43 to Day 7 19:40:44  
Significant run from Day 7 20:42:47 to Day 7 21:46:58  
Significant run from Day 7 22:48:26 to Day 8 00:20:41  
Significant run from Day 8 00:51:26 to Day 8 01:52:58  
Significant run from Day 8 03:25:15 to Day 8 03:56:02  
Significant run from Day 8 04:26:47 to Day 8 04:57:34  
Significant run from Day 8 05:59:07 to Day 8 07:31:25  
Significant run from Day 8 09:34:32 to Day 8 10:05:19  
Significant run from Day 8 11:06:53 to Day 8 11:37:41  
Significant run from Day 8 12:08:29 to Day 8 13:09:56

Significant run from Day 8 14:44:28 to Day 8 15:45:56  
Significant run from Day 8 16:16:41 to Day 8 17:18:15  
Significant run from Day 8 17:49:03 to Day 8 18:19:52  
Significant run from Day 8 18:50:41 to Day 8 19:21:32  
Significant run from Day 8 19:52:23 to Day 8 20:23:16  
Significant run from Day 8 20:54:08 to Day 8 21:25:04  
Significant run from Day 8 21:55:56 to Day 8 22:58:07  
Significant run from Day 8 23:29:02 to Day 8 00:00:05  
Significant run from Day 9 00:31:05 to Day 9 02:04:09  
Significant run from Day 9 03:06:20 to Day 9 05:10:51  
Significant run from Day 9 06:45:44 to Day 9 07:16:28  
Significant run from Day 9 08:17:58 to Day 9 08:48:41  
Significant run from Day 9 09:50:16 to Day 9 10:21:04  
Significant run from Day 9 10:51:53 to Day 9 11:22:43  
Significant run from Day 9 13:26:12 to Day 9 16:00:52  
Significant run from Day 9 17:33:47 to Day 9 18:04:48  
Significant run from Day 9 18:35:54 to Day 9 19:07:00  
Significant run from Day 9 19:38:03 to Day 9 20:09:11  
Significant run from Day 9 20:40:20 to Day 9 21:42:30  
Significant run from Day 9 22:13:28 to Day 9 23:17:26  
Significant run from Day 9 23:48:11 to Day 10 00:49:39  
Significant run from Day 10 01:51:13 to Day 10 02:22:00  
Significant run from Day 10 02:52:49 to Day 10 03:23:39  
Significant run from Day 10 04:25:20 to Day 10 06:59:52  
Significant run from Day 10 08:01:49 to Day 10 09:03:49  
Significant run from Day 10 09:34:47 to Day 10 10:36:45  
Significant run from Day 10 11:07:50 to Day 10 11:38:50  
Significant run from Day 10 15:18:26 to Day 10 15:49:07  
Significant run from Day 10 16:19:51 to Day 10 16:50:35  
Significant run from Day 10 18:53:40 to Day 10 19:24:31  
Significant run from Day 10 19:55:23 to Day 10 20:26:15  
Significant run from Day 10 20:57:09 to Day 10 23:00:50  
Significant run from Day 10 23:31:47 to Day 11 00:02:44  
Significant run from Day 11 00:34:18 to Day 11 01:36:14  
Significant run from Day 11 02:38:11 to Day 11 03:09:16  
Significant run from Day 11 04:11:20 to Day 11 05:13:34  
Significant run from Day 11 09:23:52 to Day 11 11:27:04  
Significant run from Day 11 11:57:55 to Day 11 13:30:25  
Significant run from Day 11 15:03:06 to Day 11 18:09:16  
Significant run from Day 11 20:44:28 to Day 11 21:46:42  
Significant run from Day 11 22:48:55 to Day 11 23:20:00  
Significant run from Day 12 00:24:15 to Day 12 00:54:58  
Significant run from Day 12 01:25:39 to Day 12 01:56:24  
Significant run from Day 12 03:59:34 to Day 12 04:30:22  
Significant run from Day 12 05:32:03 to Day 12 07:04:51  
Significant run from Day 12 08:37:38 to Day 12 10:10:15  
Significant run from Day 12 10:41:12 to Day 12 11:12:12  
Significant run from Day 12 13:46:58 to Day 12 14:49:00  
Significant run from Day 12 16:55:31 to Day 12 17:26:13  
Significant run from Day 12 18:58:27 to Day 12 20:00:02  
Significant run from Day 12 21:02:17 to Day 12 21:33:13  
Significant run from Day 12 22:04:07 to Day 12 23:06:06  
Significant run from Day 12 23:37:00 to Day 13 00:08:04  
Significant run from Day 13 01:41:17 to Day 13 02:12:21  
Significant run from Day 13 02:43:29 to Day 13 03:14:45  
Significant run from Day 13 05:19:37 to Day 13 06:22:07  
Significant run from Day 13 06:53:16 to Day 13 07:24:43  
Significant run from Day 13 10:33:11 to Day 13 11:34:40  
Significant run from Day 13 12:05:25 to Day 13 13:37:49  
Significant run from Day 13 14:39:32 to Day 13 15:10:12  
Significant run from Day 13 16:12:04 to Day 13 17:13:52  
Significant run from Day 13 19:17:50 to Day 13 19:48:54  
Significant run from Day 13 20:19:58 to Day 13 21:53:02  
Significant run from Day 13 22:55:08 to Day 13 23:26:11  
Significant run from Day 14 00:28:24 to Day 14 00:59:39  
Significant run from Day 14 02:03:51 to Day 14 02:34:35  
Significant run from Day 14 03:05:17 to Day 14 03:36:02  
Significant run from Day 14 04:06:47 to Day 14 04:37:33  
Significant run from Day 14 06:09:57 to Day 14 07:11:36  
Significant run from Day 14 07:42:27 to Day 14 08:44:14  
Significant run from Day 14 09:15:10 to Day 14 11:18:45  
Significant run from Day 14 11:49:47 to Day 14 12:51:53  
Significant run from Day 14 13:22:55 to Day 14 13:54:00  
Significant run from Day 14 14:55:58 to Day 14 15:58:08  
Significant run from Day 14 16:29:07 to Day 14 17:31:28  
Significant run from Day 14 19:37:11 to Day 14 20:07:56  
Significant run from Day 14 22:11:03 to Day 14 22:41:51  
Significant run from Day 14 23:12:40 to Day 14 23:43:33  
Significant run from Day 15 05:24:04 to Day 15 06:26:04  
Significant run from Day 15 09:01:38 to Day 15 09:32:48  
Significant run from Day 15 10:35:11 to Day 15 11:08:34  
Significant run from Day 15 11:39:16 to Day 15 14:13:01

Significant run from Day 15 15:45:28 to Day 15 16:16:17  
Significant run from Day 15 17:18:02 to Day 15 18:19:50  
Significant run from Day 15 18:50:47 to Day 15 19:52:37  
Significant run from Day 15 23:29:33 to Day 16 00:00:40  
Significant run from Day 16 00:31:38 to Day 16 01:02:47  
Significant run from Day 16 01:33:54 to Day 16 02:36:02  
Significant run from Day 16 03:40:13 to Day 16 04:10:55  
Significant run from Day 16 04:41:38 to Day 16 05:12:22  
Significant run from Day 16 06:13:55 to Day 16 07:15:30  
Significant run from Day 16 07:46:19 to Day 16 09:18:50  
Significant run from Day 16 11:22:18 to Day 16 11:53:13  
Significant run from Day 16 12:55:06 to Day 16 13:26:00  
Significant run from Day 16 13:56:57 to Day 16 14:58:52  
Significant run from Day 16 16:00:59 to Day 16 16:32:11  
Significant run from Day 16 17:03:16 to Day 16 17:34:23  
Significant run from Day 16 18:05:33 to Day 16 18:36:41  
Significant run from Day 16 19:38:52 to Day 16 22:15:12  
Significant run from Day 17 01:19:50 to Day 17 01:50:36  
Significant run from Day 17 02:21:23 to Day 17 02:52:09  
Significant run from Day 17 03:23:00 to Day 17 03:53:52  
Significant run from Day 17 04:24:41 to Day 17 04:55:29  
Significant run from Day 17 06:58:43 to Day 17 08:00:24  
Significant run from Day 17 09:02:01 to Day 17 09:32:54  
Significant run from Day 17 10:03:44 to Day 17 11:05:29  
Significant run from Day 17 12:07:09 to Day 17 13:11:01  
Significant run from Day 17 13:41:45 to Day 17 14:43:10  
Significant run from Day 17 15:13:56 to Day 17 15:44:37  
Significant run from Day 17 17:16:45 to Day 17 17:47:32  
Significant run from Day 17 18:49:04 to Day 17 19:19:49  
Significant run from Day 17 20:21:19 to Day 17 20:52:09  
Significant run from Day 17 21:22:53 to Day 17 21:53:40  
Significant run from Day 17 22:24:27 to Day 17 23:26:02  
Significant run from Day 18 00:27:39 to Day 18 00:58:28  
Significant run from Day 18 02:00:20 to Day 18 03:02:06  
Significant run from Day 18 05:08:02 to Day 18 05:38:43  
Significant run from Day 18 06:40:12 to Day 18 07:10:59  
Significant run from Day 18 07:41:47 to Day 18 08:43:24  
Significant run from Day 18 09:14:11 to Day 18 09:45:06  
Significant run from Day 18 10:15:56 to Day 18 11:17:40  
Significant run from Day 18 12:50:21 to Day 18 13:21:16  
Significant run from Day 18 14:54:17 to Day 18 15:25:22  
Significant run from Day 18 15:56:23 to Day 18 16:58:26  
Significant run from Day 18 18:31:47 to Day 18 19:03:00  
Significant run from Day 18 19:34:11 to Day 18 20:36:31  
Significant run from Day 18 22:42:20 to Day 18 23:43:47  
Significant run from Day 19 00:45:19 to Day 19 01:16:07  
Significant run from Day 19 02:48:30 to Day 19 03:19:19  
Significant run from Day 19 03:50:08 to Day 19 04:20:58  
Significant run from Day 19 04:51:48 to Day 19 05:22:40  
Significant run from Day 19 06:24:26 to Day 19 06:55:23  
Significant run from Day 19 08:28:06 to Day 19 10:32:02  
Significant run from Day 19 11:03:08 to Day 19 12:36:06  
Significant run from Day 19 15:12:52 to Day 19 16:14:16  
Significant run from Day 19 17:15:43 to Day 19 17:46:27  
Significant run from Day 19 19:18:39 to Day 19 19:49:28  
Significant run from Day 19 20:20:10 to Day 19 20:50:56  
Significant run from Day 19 21:52:28 to Day 19 23:25:00  
Significant run from Day 20 00:26:31 to Day 20 00:57:18  
Significant run from Day 20 01:28:06 to Day 20 03:31:30  
Significant run from Day 20 04:02:20 to Day 20 04:33:13  
Significant run from Day 20 07:09:44 to Day 20 07:40:43  
Significant run from Day 20 08:11:27 to Day 20 09:12:48

Significant increases/decreases in cell density in the permeate, based on the Sign of differences test.

Significant run from Day 1 18:50:18 to Day 1 21:22:06  
Significant run from Day 1 19:21:05 to Day 1 19:51:06  
Significant run from Day 1 20:20:39 to Day 1 20:51:13  
Significant run from 2021-05-06 23:25:52 to Day 2 02:01:16  
Significant run from Day 2 04:37:16 to Day 2 05:39:52  
Significant run from Day 2 07:13:53 to Day 2 07:45:17  
Significant run from Day 2 08:49:59 to Day 2 09:20:36  
Significant run from Day 2 11:54:24 to Day 2 12:25:14  
Significant run from Day 2 13:26:53 to Day 2 14:28:38  
Significant run from Day 2 14:59:29 to Day 2 16:01:17  
Significant run from Day 2 16:31:07 to Day 2 17:32:46  
Significant run from Day 2 20:07:51 to Day 2 22:12:08  
Significant run from Day 2 22:43:15 to Day 2 23:14:23  
Significant run from Day 2 23:45:33 to Day 3 00:16:44  
Significant run from Day 3 01:51:55 to Day 3 02:22:40  
Significant run from Day 3 03:24:11 to Day 3 03:54:58  
Significant run from Day 3 04:25:48 to Day 3 04:56:38  
Significant run from Day 3 05:27:30 to Day 3 06:29:17  
Significant run from Day 3 08:02:07 to Day 3 09:04:08  
Significant run from Day 3 09:35:10 to Day 3 10:06:15  
Significant run from Day 3 11:08:25 to Day 3 11:39:33  
Significant run from Day 3 12:10:42 to Day 3 12:41:53  
Significant run from Day 3 14:15:27 to Day 3 14:46:43  
Significant run from Day 3 17:56:32 to Day 3 18:58:02  
Significant run from Day 3 21:01:14 to Day 3 21:32:05  
Significant run from Day 3 22:02:58 to Day 3 23:04:50  
Significant run from Day 3 23:35:48 to Day 4 01:39:50  
Significant run from Day 4 02:41:58 to Day 4 03:13:04  
Significant run from Day 4 04:15:22 to Day 4 04:46:32  
Significant run from Day 4 05:48:57 to Day 4 06:20:13  
Significant run from Day 4 06:51:31 to Day 4 07:22:51  
Significant run from Day 4 07:54:10 to Day 4 08:25:32  
Significant run from Day 4 10:33:11 to Day 4 11:03:54  
Significant run from Day 4 11:34:39 to Day 4 12:05:26  
Significant run from Day 4 12:36:14 to Day 4 13:07:04  
Significant run from Day 4 17:14:44 to Day 4 17:45:48  
Significant run from Day 4 18:17:10 to Day 4 20:52:07  
Significant run from Day 5 00:59:45 to Day 5 01:30:50  
Significant run from Day 5 03:05:57 to Day 5 04:07:23  
Significant run from Day 5 05:08:48 to Day 5 05:39:31  
Significant run from Day 5 06:10:14 to Day 5 06:40:55  
Significant run from Day 5 07:11:39 to Day 5 07:42:22  
Significant run from Day 5 08:13:06 to Day 5 08:43:48  
Significant run from Day 5 09:14:33 to Day 5 09:45:16  
Significant run from Day 5 10:15:55 to Day 5 10:46:39  
Significant run from Day 5 21:37:05 to Day 5 22:07:52  
Significant run from Day 5 23:09:35 to Day 5 23:40:28  
Significant run from Day 6 02:15:22 to Day 6 02:46:29  
Significant run from Day 6 04:19:44 to Day 6 05:22:05  
Significant run from Day 6 08:29:36 to Day 6 09:32:19  
Significant run from Day 6 10:03:42 to Day 6 10:35:15  
Significant run from Day 6 11:37:46 to Day 6 12:11:00  
Significant run from Day 6 14:13:49 to Day 6 14:44:37  
Significant run from Day 6 16:17:10 to Day 6 17:19:00  
Significant run from Day 6 19:22:48 to Day 6 19:53:52  
Significant run from Day 6 20:24:55 to Day 6 20:56:01  
Significant run from Day 7 01:36:45 to Day 7 02:08:06  
Significant run from Day 7 03:10:48 to Day 7 03:42:17  
Significant run from Day 7 04:13:09 to Day 7 04:46:24  
Significant run from Day 7 05:17:08 to Day 7 05:47:51  
Significant run from Day 7 07:20:09 to Day 7 07:50:59  
Significant run from Day 7 08:21:45 to Day 7 09:23:22  
Significant run from Day 7 09:53:35 to Day 7 11:26:02  
Significant run from Day 7 14:00:28 to Day 7 14:31:24  
Significant run from Day 7 15:02:20 to Day 7 16:04:08  
Significant run from Day 7 19:09:41 to Day 7 19:40:44  
Significant run from Day 7 21:46:58 to Day 7 22:17:41  
Significant run from Day 7 23:19:10 to Day 8 00:51:26  
Significant run from Day 8 01:52:58 to Day 8 02:23:44  
Significant run from Day 8 03:25:15 to Day 8 03:56:02  
Significant run from Day 8 04:26:47 to Day 8 04:57:34  
Significant run from Day 8 05:59:07 to Day 8 06:29:52  
Significant run from Day 8 09:03:45 to Day 8 10:05:19  
Significant run from Day 8 10:36:07 to Day 8 12:39:18  
Significant run from Day 8 13:43:02 to Day 8 14:44:28  
Significant run from Day 8 15:15:12 to Day 8 16:47:28  
Significant run from Day 8 17:18:15 to Day 8 18:50:41  
Significant run from Day 8 19:52:23 to Day 8 20:23:16

Significant run from Day 8 21:25:04 to Day 8 22:58:07  
Significant run from Day 8 00:00:05 to Day 9 01:02:05  
Significant run from Day 9 02:04:09 to Day 9 02:35:12  
Significant run from Day 9 03:06:20 to Day 9 03:37:31  
Significant run from Day 9 04:08:35 to Day 9 05:10:51  
Significant run from Day 9 06:15:03 to Day 9 07:16:28  
Significant run from Day 9 07:47:11 to Day 9 08:48:41  
Significant run from Day 9 10:21:04 to Day 9 10:51:53  
Significant run from Day 9 12:24:25 to Day 9 12:55:22  
Significant run from Day 9 13:26:12 to Day 9 13:57:05  
Significant run from Day 9 14:27:59 to Day 9 14:58:55  
Significant run from Day 9 16:00:52 to Day 9 16:31:49  
Significant run from Day 9 18:04:48 to Day 9 18:35:54  
Significant run from Day 9 19:07:00 to Day 9 19:38:03  
Significant run from Day 9 20:09:11 to Day 9 21:42:30  
Significant run from Day 9 22:13:28 to Day 9 22:46:44  
Significant run from Day 10 00:18:56 to Day 10 00:49:39  
Significant run from Day 10 02:52:49 to Day 10 04:25:20  
Significant run from Day 10 05:58:02 to Day 10 06:28:56  
Significant run from Day 10 07:30:52 to Day 10 08:32:51  
Significant run from Day 10 12:40:55 to Day 10 13:43:01  
Significant run from Day 10 16:50:35 to Day 10 17:21:20  
Significant run from Day 10 17:52:06 to Day 10 18:22:52  
Significant run from Day 10 19:24:31 to Day 10 21:58:56  
Significant run from Day 10 22:29:55 to Day 10 23:00:50  
Significant run from Day 11 01:05:11 to Day 11 01:36:14  
Significant run from Day 11 03:09:16 to Day 11 04:11:20  
Significant run from Day 11 04:42:23 to Day 11 05:13:34  
Significant run from Day 11 08:22:21 to Day 11 08:53:06  
Significant run from Day 11 09:23:52 to Day 11 09:54:39  
Significant run from Day 11 10:25:27 to Day 11 10:56:15  
Significant run from Day 11 11:27:04 to Day 11 14:01:19  
Significant run from Day 11 14:32:11 to Day 11 15:03:06  
Significant run from Day 11 16:05:03 to Day 11 19:11:20  
Significant run from Day 11 20:44:28 to Day 11 21:46:42  
Significant run from Day 11 22:48:55 to Day 11 23:20:00  
Significant run from Day 12 00:24:15 to Day 12 01:56:24  
Significant run from Day 12 05:01:12 to Day 12 06:02:55  
Significant run from Day 12 06:33:52 to Day 12 08:06:43  
Significant run from Day 12 09:39:18 to Day 12 10:10:15  
Significant run from Day 12 10:41:12 to Day 12 11:42:59  
Significant run from Day 12 12:45:02 to Day 12 13:16:00  
Significant run from Day 12 13:46:58 to Day 12 14:49:00  
Significant run from Day 12 17:26:13 to Day 12 17:56:57  
Significant run from Day 12 18:27:41 to Day 12 18:58:27  
Significant run from Day 12 20:00:02 to Day 12 20:31:15  
Significant run from Day 12 21:33:13 to Day 12 23:06:06  
Significant run from Day 13 00:08:04 to Day 13 00:39:05  
Significant run from Day 13 01:41:17 to Day 13 02:43:29  
Significant run from Day 13 04:17:09 to Day 13 04:48:16  
Significant run from Day 13 05:19:37 to Day 13 05:50:43  
Significant run from Day 13 06:53:16 to Day 13 07:24:43  
Significant run from Day 13 10:33:11 to Day 13 11:34:40  
Significant run from Day 13 13:07:00 to Day 13 13:37:49  
Significant run from Day 13 14:08:42 to Day 13 15:10:12  
Significant run from Day 13 16:43:00 to Day 13 17:13:52  
Significant run from Day 13 17:44:53 to Day 13 18:46:55  
Significant run from Day 13 19:17:50 to Day 13 19:48:54  
Significant run from Day 13 20:19:58 to Day 13 21:21:54  
Significant run from Day 13 22:24:09 to Day 13 22:55:08  
Significant run from Day 13 23:57:14 to Day 14 00:59:39  
Significant run from Day 14 02:03:51 to Day 14 02:34:35  
Significant run from Day 14 04:06:47 to Day 14 04:37:33  
Significant run from Day 14 05:08:21 to Day 14 05:39:09  
Significant run from Day 14 06:09:57 to Day 14 06:40:46  
Significant run from Day 14 07:42:27 to Day 14 08:13:27  
Significant run from Day 14 10:47:50 to Day 14 11:18:45  
Significant run from Day 14 14:55:58 to Day 14 15:26:59  
Significant run from Day 14 15:58:08 to Day 14 16:29:07  
Significant run from Day 14 21:09:28 to Day 14 22:11:03  
Significant run from Day 14 22:41:51 to Day 14 23:12:40  
Significant run from Day 14 23:43:33 to Day 15 00:14:21  
Significant run from Day 15 01:16:05 to Day 15 01:47:00  
Significant run from Day 15 02:17:59 to Day 15 02:48:58  
Significant run from Day 15 03:51:01 to Day 15 04:21:58  
Significant run from Day 15 05:24:04 to Day 15 05:55:00  
Significant run from Day 15 07:28:18 to Day 15 08:30:29  
Significant run from Day 15 09:01:38 to Day 15 10:04:04  
Significant run from Day 15 11:08:34 to Day 15 11:39:16  
Significant run from Day 15 13:42:14 to Day 15 14:13:01  
Significant run from Day 15 15:45:28 to Day 15 16:16:17  
Significant run from Day 15 16:47:09 to Day 15 17:18:02

Significant run from Day 15 18:19:50 to Day 15 18:50:47  
Significant run from Day 15 20:54:30 to Day 15 21:25:27  
Significant run from Day 15 22:27:26 to Day 15 22:58:36  
Significant run from Day 16 01:02:47 to Day 16 02:36:02  
Significant run from Day 16 06:13:55 to Day 16 06:44:40  
Significant run from Day 16 07:15:30 to Day 16 08:17:08  
Significant run from Day 16 08:48:00 to Day 16 09:18:50  
Significant run from Day 16 12:24:07 to Day 16 12:55:06  
Significant run from Day 16 14:27:55 to Day 16 14:58:52  
Significant run from Day 16 15:29:54 to Day 16 16:32:11  
Significant run from Day 16 18:05:33 to Day 16 19:07:43  
Significant run from Day 16 20:42:57 to Day 16 22:15:12  
Significant run from Day 17 01:19:50 to Day 17 01:50:36  
Significant run from Day 17 02:21:23 to Day 17 02:52:09  
Significant run from Day 17 03:23:00 to Day 17 04:24:41  
Significant run from Day 17 05:57:07 to Day 17 06:58:43  
Significant run from Day 17 09:02:01 to Day 17 09:32:54  
Significant run from Day 17 12:40:20 to Day 17 13:11:01  
Significant run from Day 17 14:12:26 to Day 17 14:43:10  
Significant run from Day 17 15:13:56 to Day 17 16:46:03  
Significant run from Day 17 17:16:45 to Day 17 18:49:04  
Significant run from Day 17 21:22:53 to Day 17 21:53:40  
Significant run from Day 17 22:24:27 to Day 17 23:26:02  
Significant run from Day 18 00:27:39 to Day 18 03:02:06  
Significant run from Day 18 05:08:02 to Day 18 05:38:43  
Significant run from Day 18 06:09:29 to Day 18 06:40:12  
Significant run from Day 18 07:10:59 to Day 18 07:41:47  
Significant run from Day 18 08:43:24 to Day 18 10:15:56  
Significant run from Day 18 11:17:40 to Day 18 11:48:32  
Significant run from Day 18 12:50:21 to Day 18 13:21:16  
Significant run from Day 18 15:25:22 to Day 18 15:56:23  
Significant run from Day 18 19:03:00 to Day 18 20:36:31  
Significant run from Day 18 21:07:36 to Day 18 22:11:36  
Significant run from Day 18 22:42:20 to Day 18 23:13:05  
Significant run from Day 19 02:48:30 to Day 19 03:19:19  
Significant run from Day 19 03:50:08 to Day 19 04:20:58  
Significant run from Day 19 05:22:40 to Day 19 06:24:26  
Significant run from Day 19 08:28:06 to Day 19 10:32:02  
Significant run from Day 19 11:03:08 to Day 19 12:36:06  
Significant run from Day 19 15:43:34 to Day 19 16:44:58  
Significant run from Day 19 17:15:43 to Day 19 18:17:10  
Significant run from Day 19 18:47:54 to Day 19 19:49:28  
Significant run from Day 19 20:20:10 to Day 19 21:21:43  
Significant run from Day 19 22:54:13 to Day 19 23:55:44  
Significant run from Day 20 00:26:31 to Day 20 01:28:06  
Significant run from Day 20 02:29:47 to Day 20 03:00:37  
Significant run from Day 20 04:02:20 to Day 20 04:33:13  
Significant run from Day 20 08:42:11 to Day 20 09:43:24
